# Supplementary material
Source: Springer Nature journal article supplement (https://www.springermedizin.de/resource/supplementary/13256_2011_1915_MOESM4_ESM.pdf/9648730)

**A**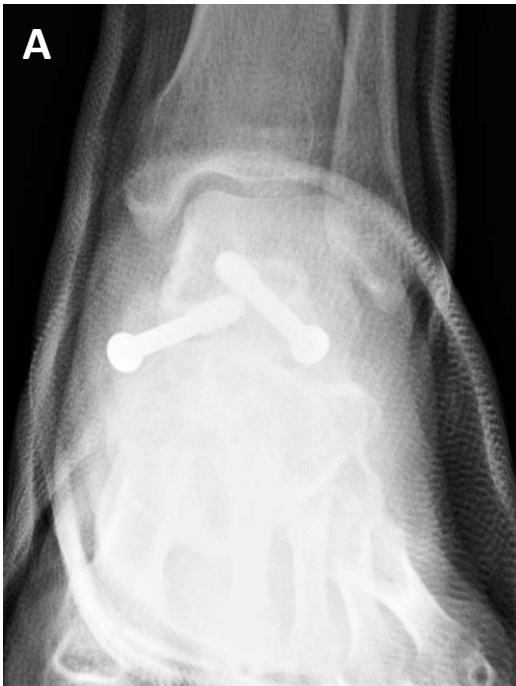**B**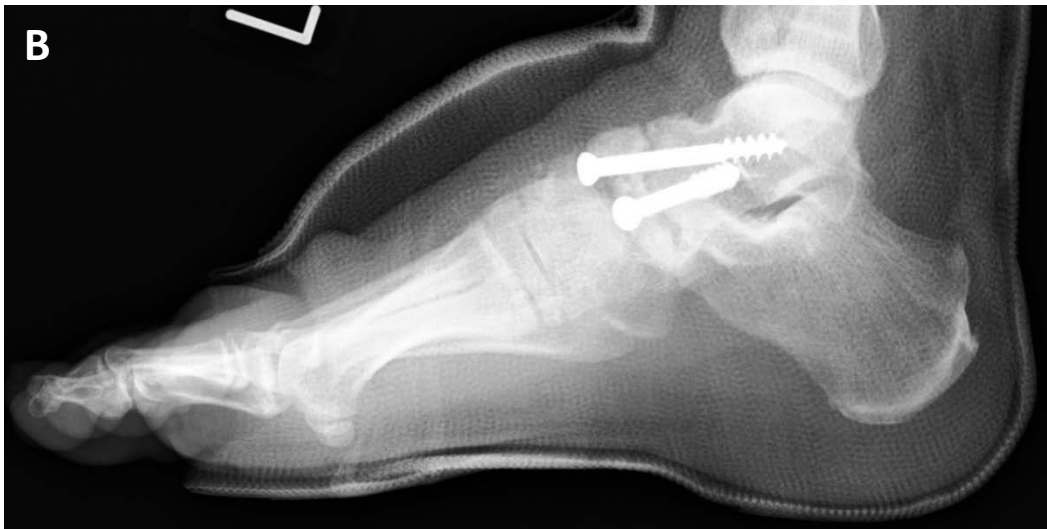

Supplement: MOESM4 [file 9648730]
